# Supplementary material for: SAA1/TLR2 axis directs chemotactic migration of hepatic stellate cells responding to injury
Source: PubMed Central journal article supplement (PMC8169952; doi:10.1016/j.isci.2021.102483), 2021-04-29
Supplement: mmc1.pdf [file mmc1.pdf]

**Supplemental information**

**SAA1/TLR2 axis directs**

**chemotactic migration of hepatic**

**stellate cells responding to injury**

**Anteneh Getachew, Nasir Abbas, Kai You, Zhen Yang, Muzammal Hussain, Xiping Huang, Ziqi Cheng, Shenglin Tan, Jiawang Tao, Xiaorui Yu, Yan Chen, Fan Yang, Tingcai Pan, Yingying Xu, Guosheng Xu, Yuanqi Zhuang, FeiMa Wu, and Yinxiong Li**

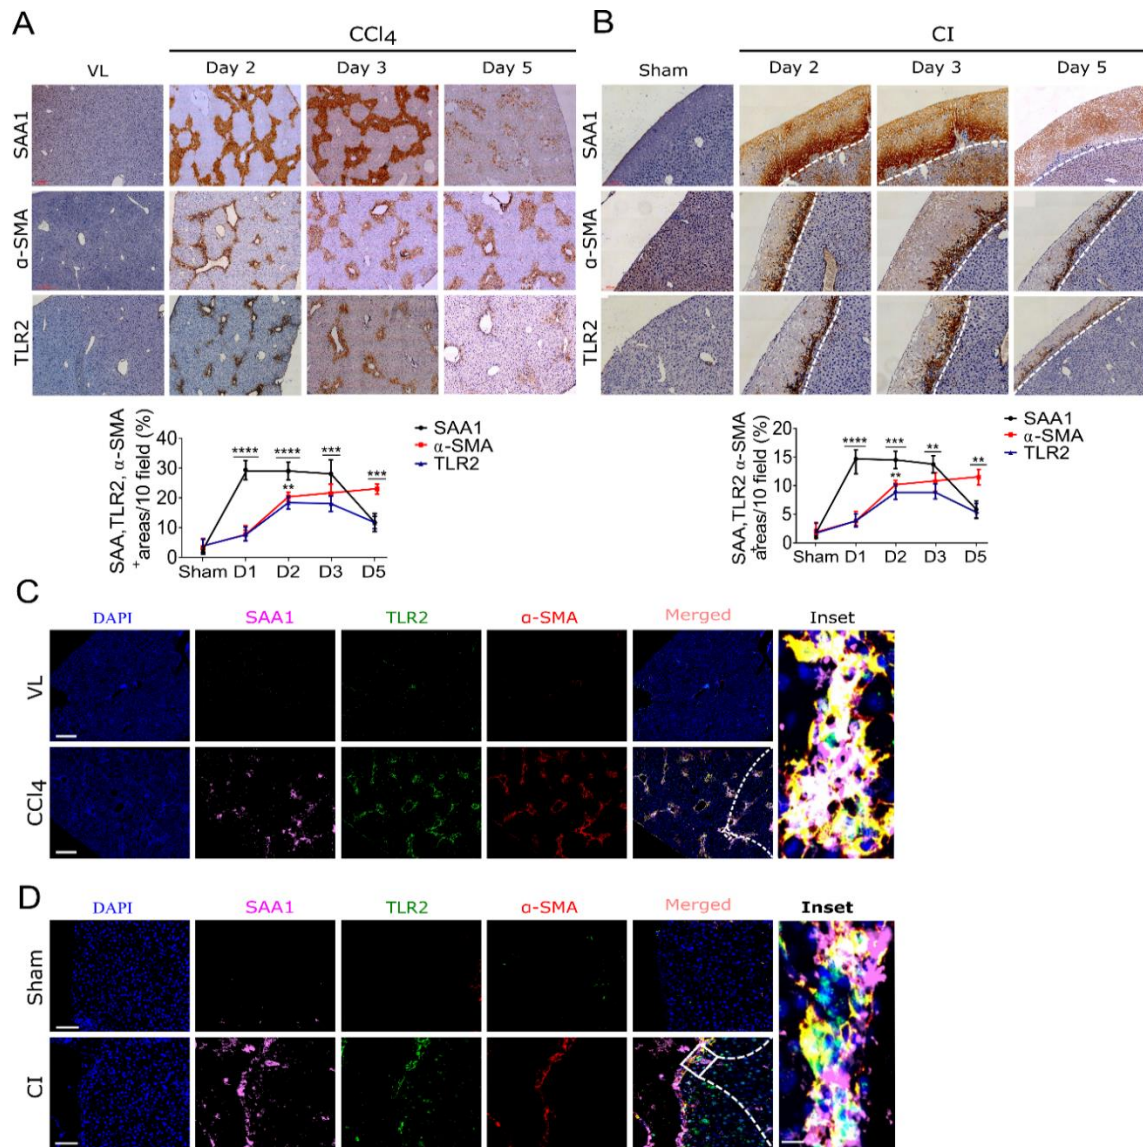

**Figure S1. Expression and pathological relevance of SAA1, TLR2 and HSCs at injury locus, Related to Figure 2.** (A) Representative IHC staining of SAA1,  $\alpha$ -SMA and TLR2 in CCl<sub>4</sub> injury model at indicated time intervals. (B) Representative IHC staining of SAA1,  $\alpha$ -SMA and TLR2 in CI injury model at indicated time intervals. Bar graphs represent quantification of IHC positive cells/area in CCl<sub>4</sub> and CI injury model at indicated time intervals. (C and D) Confocal immunofluorescence images showing colocalization of SAA1, TLR2 and HSCs at CCl<sub>4</sub> (C) and CI injury (D) models.

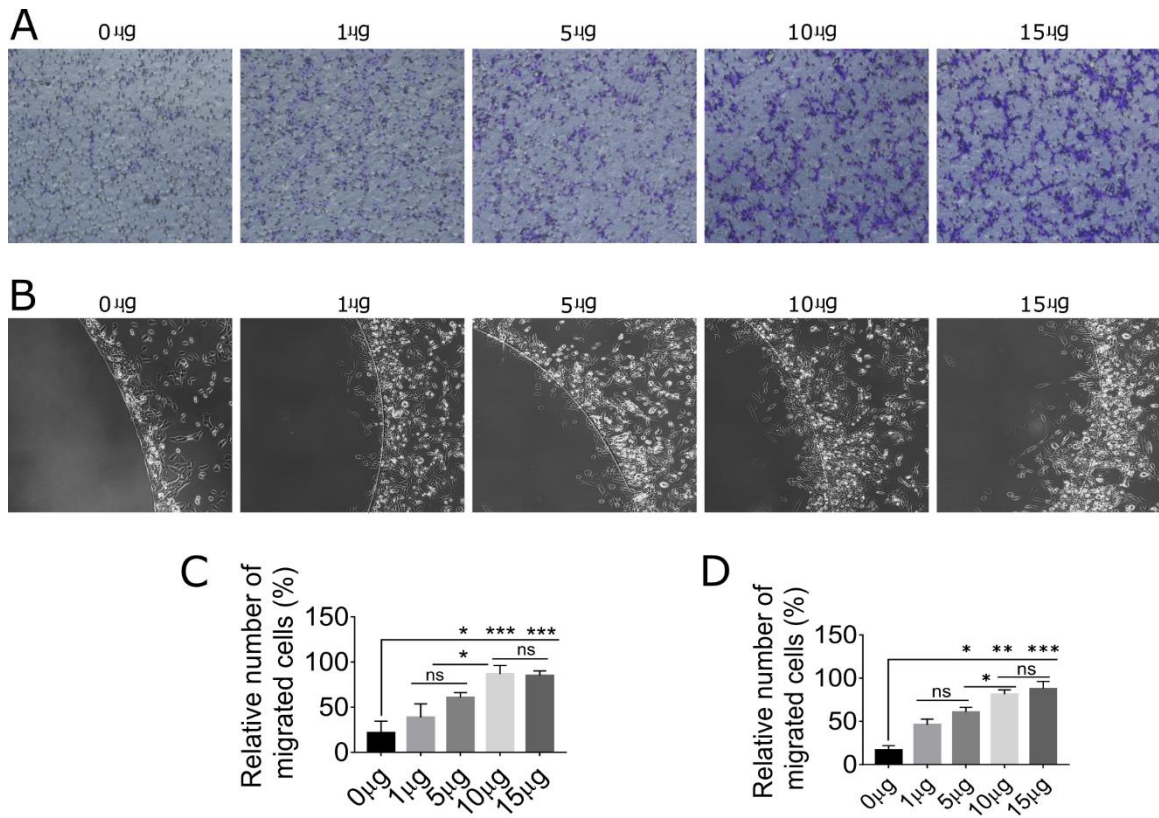

**Figure S2. SAA1 mediates migration of HSCs in dose-dependent manner, Related to Figure 2.** (A) Representative Transwell migration assays showing SAA1 mediates migration of LX-2 cells in dose dependent (1-15µg) manner. (B) Representative Agarose spot migration assay showing the cells migrate under SAA1 containing spot in dose-dependent manner at indicated concentrations. (C) Quantification of Transwell migration assay. SAA1 attract LX-2 cells with maximal concentration of 10 to 15 µg/ml. (D) Quantification of agarose migration assay the maximal concentration by which SAA1 attract more numerous cells were shown at 10 to 15µg/ml.

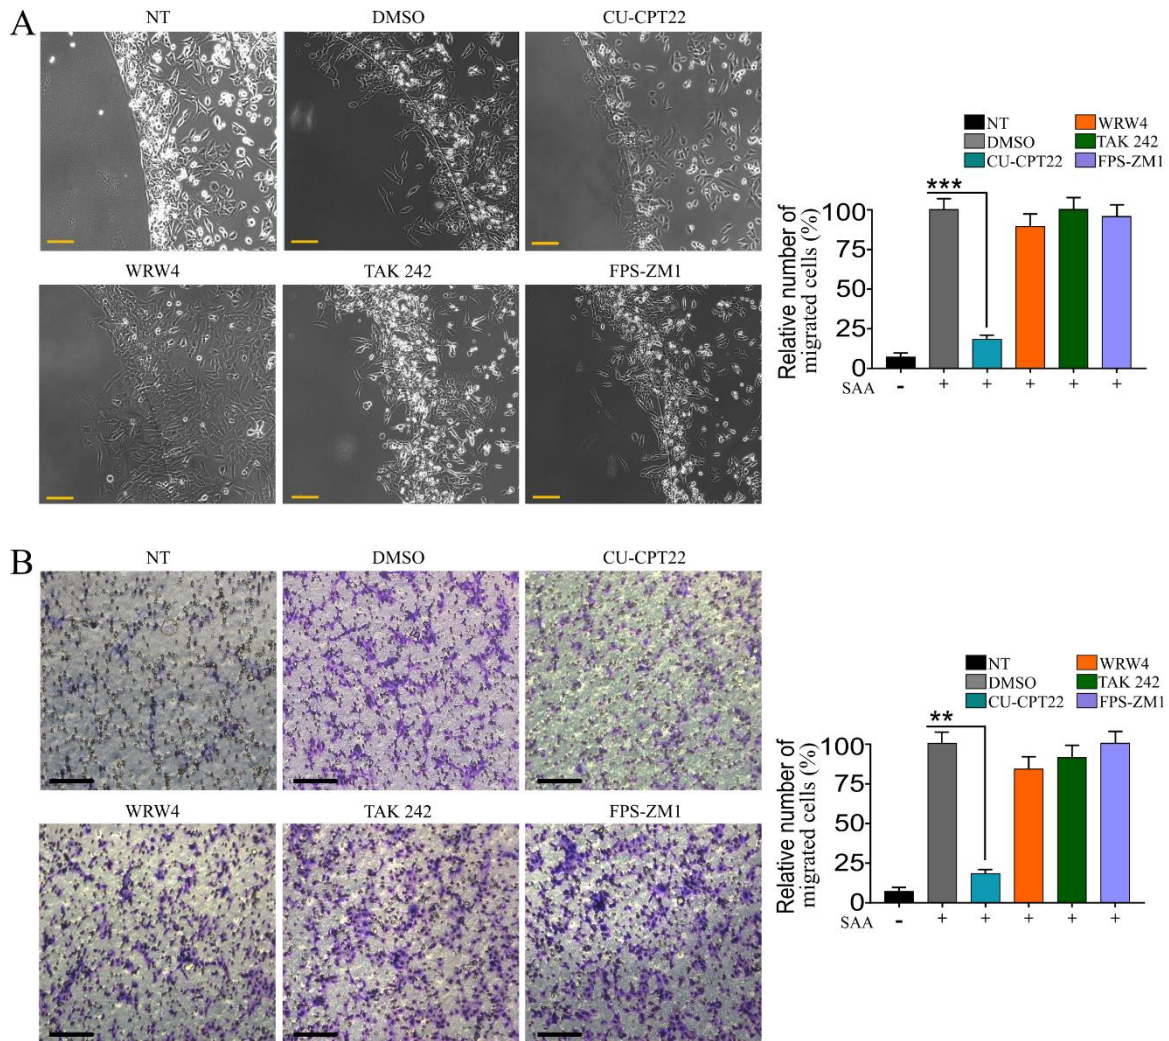

**Figure S3. Inhibitor of TLR2 (CU\_CPT22) has blocked migration of LX-2 cells in agarose spot and Transwell assays, Related to Figure 3.** (A) Agarose spot migration assay showing LX-2 cells pretreated with different inhibitors and the effects in SAA1 induced migration. (B) Transwell migration assay showing LX-2 cells pretreated with different inhibitors and the effects in SAA1 induced migration.

**Table S1. Stealth RNAi™ siRNA sequences used for *in vivo* knockdown of SAA1, Related to Figure 1.**

|             |                     |
|-------------|---------------------|
| SAA1-siRNA1 | CAACUAUGAUGCUGCUCAA |
| SAA1-siRNA2 | GUCCUCCUAUUAGCUCAGU |
| SAA1-siRNA3 | GAGGAGAGGGUAAUAAACA |
| SAA1-siRNA4 | CAUAACCUAUUGCUCUCGU |
| SAA1-siRNA5 | GACCUCCUAUUAGCUCACA |

**Table S2. siRNA sequences used to knockdown of TLR2 in HSCs, Related to STAR methods Transfection of siRNA.**

| siRNA          | (5'-3')                  | Modification |
|----------------|--------------------------|--------------|
| Rat-Tlr2-si-1  | CAGCAGAAUCAAUACAAUAdTdT  | N/A          |
|                | UAUUGUAUUGAUUCUGCUGdTdT  |              |
| Rat -Tlr2-si-2 | GCCUUGACCUGUCUUUCAAdTdT  | N/A          |
|                | UUGAAAGACAGGUCAAGGCdTdT  |              |
| Rat -Tlr2-si-3 | GGAAAUGUAGAGACUUUCAAdTdT | N/A          |
|                | UGAAAGUCUCUACAUUUCCdTdT  |              |
|                | UAAAUGUUCAAGACUGCCCdTdT  |              |
| NC             | UUCUCCGAACGUGUCACGUdTdT  | N/A          |
|                | ACGUGACACGUUCGGAGAAAdTdT |              |
| FAM NC         | UUCUCCGAACGUGUCACGUdTdT  | 5'Fam        |
|                | ACGUGACACGUUCGGAGAAAdTdT |              |
| M/H MAPK1siRNA | UGCUGACUCCAAAGCUCUGdTdT  | N/A          |
|                | CAGAGCUUUGGAGUCAGCAAdTdT |              |
| GAPDH          | GUGGAGAUUGUUGCCAUCAAdTdT | N/A          |
|                | UGAUGGCAACAAUCUCCACdTdT  |              |

**Table S3. Primers for used in this study, Related to STAR methods Real-Time Polymerase Chain Reaction.**

| Primers |           |                    | Sequences                                       | Gene ID    |
|---------|-----------|--------------------|-------------------------------------------------|------------|
| Species | Gene name |                    |                                                 |            |
| Human   | TLR2      | Forward<br>Reverse | gttgcaagcaggatccaaag<br>tgtcttctgccttacttg      | ID: 7097   |
| Rat     | TLR2      | Forward<br>Reverse | aggactcaagagcatcggt<br>gcagaatggccttccctga      | ID: 310553 |
| Human   | FPR2      | Forward<br>Reverse | agccaagaagcacacaggaa<br>atccgcagaacagtgtagcc    | ID: 2358   |
| Rat     | FPR2      | Forward<br>Reverse | tgctggacgtagcaaact<br>actcgttaaggacgactgga      | ID: 690158 |
| Human   | AGER      | Forward<br>Reverse | cctcaggaccaggaaccta<br>gaggctcaccgatgatgct      | ID: 177    |
| Rat     | AGER      | Forward<br>Reverse | agaaaccggtgatgaaggaca<br>ggtgtcgttttcgccacag    | ID: 81722  |
| Human   | TLR4      | Forward<br>Reverse | agacctgtccctgaaccctat<br>cgatggacttctaaaccagcca | ID: 7099   |
| Rat     | TLR4      | Forward<br>Reverse | gaggacaatgctctggggag<br>atgggttttaggcgcagagt    | ID: 29260  |
| Human   | SR-B1     | Forward<br>Reverse | cctatccccttctatctctccg<br>ggatgttggcatgacgatgt  | ID: 949    |
| Rat     | SR-B1     | Forward<br>Reverse | gaacacgttctacacgcagc<br>cctgcatggcctccttatcc    | ID: 25073  |
| Human   | MCP-1     | Forward<br>Reverse | cagccagatgcaatcaatgcc<br>tggatcctgaaccacttct    | ID: 6347   |
| Human   | IL-8      | Forward<br>Reverse | tttgccaaggagtgctaaaga<br>aacctctgcaccagtttc     | ID: 3576   |
| Human   | RANTES    | Forward<br>Reverse | ccagcagtcgtcttgcac<br>ctctgggtggcacacact        | ID: 6352   |
